# Supplementary material
Source: PubMed Central journal article supplement (PMC3659980)
Supplement: supp_2012.076752_2012_076752-Contributions.pdf [file supp_2012.076752_2012_076752-Contributions.pdf]

**Manuscript no. HAEMATOL2012/076752 entitled “Involvement of TGF $\beta$ 1 in autocrine regulation of proplatelet formation in healthy subjects and patients with primary myelofibrosis”**

**Authors: Stefania Badalucco, Christian Andrea Di Buduo, Rita Campanelli, Isabella Pallotta, Paolo Catarsi, Vittorio Rosti, David L. Kaplan, Giovanni Barosi, Margherita Massa, Alessandra Balduini**

**Information about the contributions of each person named as having participated in the study**

**1) Guarantor(s)**, i.e., person(s) who is (are) responsible for the integrity of the work as a whole:  
• Alessandra Balduini, Biotechnology Research Laboratories, Department of Molecular Medicine, IRCCS San Matteo Foundation, University of Pavia, Pavia, Italy; Department of Biomedical Engineering, Tufts University, Medford, MA, USA. [alessandra.balduini@unipv.it](mailto:alessandra.balduini@unipv.it)

According to the International Committee of Medical Journal Editors (ICMJE) ([http://www.icmje.org/ethical\\_1author.html](http://www.icmje.org/ethical_1author.html)): “Authorship credit should be based on: 1) substantial contributions to conception and design, acquisition of data, or analysis and interpretation of data; 2) drafting the article or revising it critically for important intellectual content; and 3) final approval of the version to be published. Authors should meet conditions 1, 2, and 3 ..... Acquisition of funding, collection of data, or general supervision of the research group alone does not constitute authorship”.

The guarantors of this manuscript confirm that all persons designated as authors qualify for authorship, and that each author has participated sufficiently in the work to take public responsibility for appropriate portions of the content.

2) Authors who participated in the conception of the study: Vittorio Rosti, Giovanni Barosi, Alessandra Balduini

**3) Design & Methods.**

The following authors were responsible for specific investigations:

- Stefania Badalucco, Christian Andrea Di Buduo and Isabella Pallotta were responsible for human cord blood-derived megakaryocytes differentiation and analysis of proplatelet formation at different conditions;
- Stefania Badalucco and Christian Andrea Di Buduo were responsible for peripheral blood-derived megakaryocytes differentiation and analysis of proplatelet formation at different conditions;
- Stefania Badalucco and Christian Andrea Di Buduo were responsible for western blot analysis;
- Rita Campanelli was responsible for the bioassay for measurement of TGF $\beta$ 1 levels in the supernatants of megakaryocyte culture;
- Paolo Catarsi was responsible for retrotranscription and quantitative real-time polymerase chain reaction;
- Christian Andrea Di Buduo was responsible for sample preparation for flow cytometry analysis of megakaryocytes ploidy;
- Stefania Badalucco, Christian Andrea Di Buduo and Alessandra Balduini designed the experiments and analyzed the data;
- Vittorio Rosti, David L. Kaplan, Giovanni Barosi, and Margherita Massa analyzed the data.

Treated patients:

- Vittorio Rosti and Giovanni Barosi were responsible for patients recruitment to the Center for the Study of Myelofibrosis of the IRCCS Policlinico San Matteo Foundation, and for diagnosis of the disease.

4) **Results.** The following authors were responsible for specific portions of the results, including figures and tables:

- Stefania Badalucco, Christian Andrea Di Buduo, Rita Campanelli, Isabella Pallotta, and Paolo Catarsi were responsible for FIGURE 1;
- Stefania Badalucco, Christian Andrea Di Buduo, and Rita Campanelli were responsible for FIGURE 2;
- Stefania Badalucco and Christian Andrea Di Buduo were responsible for SUPPLEMENTAL FIGURE 1.

5) **Writing the manuscript.** The following authors were responsible for writing the manuscript:

- Alessandra Balduini was responsible for writing the manuscript.

6) **Contributors Listed in Acknowledgments:**

- Cesare Perotti supplied human cord blood;
- Gianluca Viarengo gave assistance with fluocytometry analysis;
- this paper was supported by Cariplo Foundation (2010.0807); Regione Lombardia - Project SAL-45, Almamater Foundation (Pavia) and Regione Lombardia - Progetto di cooperazione scientifica e tecnologica internazionale; National Institutes of Health (grant EB016041-01) and Associazione Italiana per la Ricerca sul Cancro (AIRC, Milano) “Special Program Molecular Clinical Oncology 5x1000” to AGIMM (AIRC-Gruppo Italiano Malattie Mieloproliferative).
